# Supplementary material
Source: publisher figshare collection journal article supplement (https://geolsoc.figshare.com/ndownloader/files/26436345)
Supplement: Supplementary file 1 [file 26436345]

## Sheet: PlotDat5
Source sheet	U-Pb standards	5.65611	0.0781	5	0.0791629	6.22742	0.0711219	5.92627	0.0781	5.89712	0.0749	5.75979	0.0763	5.90712	0.0784	5.77509	0.0694	5.62711	0.0788	5.87636	0.0734	5.84491	0.07	5.87001	0.0761	5.75561	0.0711	5.85876	0.0692	5.86046	0.0782	5.86133	0.0759	5.9479	0.0755	5.69669	0.0777	5.70811	0.0748	5.77464	0.0773	5.66094	0.0729	5.73795	0.0747	5.97707	0.075	5.91146	0.0710467
Plot name	Concordia4	5.64016	0.0749	5	0.0791629	6.09064	0.0718225	5.92469	0.0792115	5.89561	0.0757336	5.75843	0.0772527	5.90563	0.0792601	5.77378	0.0702601	5.62582	0.0797395	5.87487	0.0742733	5.84328	0.0708866	5.86882	0.0768939	5.7543	0.072013	5.85729	0.0700469	5.85907	0.0790072	5.8599	0.0768527	5.94645	0.0764792	5.69539	0.0785733	5.70674	0.0757527	5.77336	0.0781733	5.65953	0.0736939	5.73654	0.0755866	5.97574	0.0758336	5.66328	0.0724982
Plot Type	1	5.52792	0.0763	5.02089	0.0789842	5.95934	0.0725323	5.91995	0.08031	5.89111	0.0765575	5.75437	0.0781943	5.90118	0.0801101	5.76988	0.0711101	5.62193	0.080668	5.8704	0.0751364	5.83843	0.0717627	5.86524	0.0776786	5.75036	0.0729154	5.85291	0.0708838	5.85493	0.0798049	5.85564	0.0777943	5.94213	0.0774469	5.69154	0.0794364	5.70263	0.0766943	5.76952	0.0790364	5.65531	0.0744786	5.73233	0.0764627	5.97177	0.0766575	5.4334	0.0739884
1st free col	49	5.65291	0.0784	5.04193	0.0788061	5.83319	0.0732512	5.91213	0.0813826	5.88367	0.0773619	5.74765	0.0791136	5.89381	0.0809401	5.76344	0.0719401	5.61551	0.0815746	5.863	0.0759792	5.83041	0.0726183	5.85932	0.0784447	5.74386	0.0737964	5.84566	0.071701	5.84809	0.0805838	5.84859	0.0787136	5.93499	0.0783918	5.68516	0.0802792	5.69583	0.0776136	5.76318	0.0798792	5.64833	0.0752447	5.72537	0.0773183	5.9652	0.0774619	5.21987	0.0755185
Sigma Level	2	5.55247	0.0694	5.06314	0.0786285	5.71191	0.0739795	5.9013	0.0824167	5.87337	0.0781375	5.73836	0.08	5.88363	0.0817403	5.75451	0.0727403	5.60662	0.0824486	5.85277	0.0767917	5.81931	0.0734431	5.85113	0.0791833	5.73485	0.0746458	5.83563	0.0724889	5.83863	0.0813347	5.83884	0.0796	5.9251	0.0793028	5.67633	0.0810917	5.68643	0.0785	5.7544	0.0806917	5.63868	0.0759833	5.71573	0.0781431	5.95612	0.0782375	5.02098	0.0770897
Absolute Errs	TRUE	5.40541	0.0788	5.08451	0.0784515	5.59522	0.0747172	5.8876	0.0834002	5.86033	0.0788751	5.7266	0.080843	5.87073	0.0825013	5.74322	0.0735013	5.59538	0.0832799	5.83983	0.0775644	5.80526	0.0742275	5.84077	0.0798858	5.72346	0.0754537	5.82294	0.0732382	5.82665	0.0820489	5.8265	0.080443	5.91259	0.0801692	5.66516	0.0818644	5.67452	0.079343	5.74328	0.0814644	5.62646	0.0766858	5.70354	0.0789275	5.94462	0.0789751
Symbol Type	1	5.62113	0.0734	5.10605	0.0782749	5.48286	0.0754646	5.87118	0.0843215	5.84472	0.0795661	5.71251	0.0816327	5.85529	0.0832143	5.7297	0.0742143	5.58191	0.0840587	5.82432	0.0782883	5.78843	0.0749624	5.82836	0.0805439	5.70981	0.0762105	5.80773	0.0739402	5.8123	0.082718	5.81171	0.0812327	5.8976	0.0809809	5.65178	0.0825883	5.66027	0.0801327	5.72997	0.0821883	5.61182	0.0773439	5.68893	0.0796624	5.93085	0.0796661
Inverse Plot	TRUE	5.56793	0.07	5.12776	0.0780988	5.37459	0.0762217	5.85224	0.0851699	5.82671	0.0802024	5.69626	0.0823599	5.83747	0.0838708	5.71409	0.0748708	5.56637	0.0847758	5.80643	0.0789549	5.76901	0.0756391	5.81404	0.0811499	5.69406	0.0769074	5.79019	0.0745866	5.79575	0.0833341	5.79465	0.0819599	5.88032	0.0817283	5.63634	0.0832549	5.64382	0.0808599	5.71461	0.0828549	5.59494	0.0779499	5.67208	0.0803391	5.91497	0.0803024
Color Plot	TRUE	5.66572	0.0761	5.14964	0.0779233	5.2702	0.0769887	5.83101	0.0859354	5.80651	0.0807766	5.67803	0.0830161	5.81748	0.0844631	5.69659	0.0754631	5.54894	0.0854228	5.78637	0.0795564	5.74724	0.0762497	5.79798	0.0816967	5.6764	0.0775363	5.77052	0.0751699	5.77718	0.08389	5.77552	0.0826161	5.86093	0.0824026	5.61903	0.0838564	5.62537	0.0815161	5.69739	0.0834564	5.576	0.0784967	5.65318	0.0809497	5.89715	0.0808766
3D plot	FALSE	5.53097	0.0711	5.17169	0.0777483	5.16948	0.0777657	5.80772	0.0866091	5.78436	0.0812818	5.65804	0.0835935	5.79557	0.0849844	5.6774	0.0759844	5.52983	0.0859922	5.76437	0.0800857	5.72337	0.076787	5.78037	0.0821779	5.65704	0.0780896	5.74895	0.0756831	5.75683	0.0843792	5.75454	0.0831935	5.83967	0.0829961	5.60004	0.0843857	5.60514	0.0820935	5.67851	0.0839857	5.55524	0.0789779	5.63245	0.081487	5.87762	0.0813818
Linear	FALSE	5.60853	0.0692	5.19391	0.0775738	5.07224	0.0785529	5.78265	0.087183	5.76052	0.0817122	5.63653	0.0840854	5.77199	0.0854285	5.65675	0.0764285	5.50926	0.0864773	5.74069	0.0805366	5.69767	0.0772448	5.76141	0.0825878	5.6362	0.078561	5.72574	0.0761204	5.73492	0.084796	5.73197	0.0836854	5.81678	0.0835017	5.57961	0.0848366	5.58337	0.0825854	5.65818	0.0844366	5.53289	0.0793878	5.61014	0.0819448	5.85659	0.0818122
Data Range	F2:I21	5.6243	0.0782	5.21631	0.0773997	IsoLine	IsoLine	5.75611	0.0876504	5.73527	0.0820628	5.61374	0.084486	5.747	0.0857902	5.63487	0.0767902	5.48747	0.0868723	5.7156	0.0809039	5.67045	0.0776176	5.74134	0.0829217	5.61412	0.078945	5.70115	0.0764765	5.71171	0.0851354	5.70805	0.084086	5.79255	0.0839134	5.55797	0.0852039	5.56031	0.082986	5.63665	0.0848039	5.50922	0.0797217	5.58652	0.0823176	5.83432	0.0821628
Filled Symbols	TRUE	5.61798	0.0759	5.23889	0.0772262			5.72838	0.0880058	5.7089	0.0823294	5.58995	0.0847907	5.72092	0.0860652	5.61203	0.0770652	5.46472	0.0871728	5.68942	0.0811831	5.64203	0.0779011	5.72038	0.0831756	5.59107	0.0792369	5.67547	0.0767473	5.68748	0.0853935	5.68308	0.0843907	5.76724	0.0842265	5.53537	0.0854831	5.53623	0.0832907	5.61417	0.0850831	5.4845	0.0799756	5.56185	0.0826011	5.81106	0.0824294
ConcAge	FALSE	5.70125	0.0755	5.26165	0.0770532			5.69982	0.0882451	5.68173	0.0825088	5.56543	0.0849958	5.69404	0.0862504	5.58849	0.0772504	5.44127	0.087375	5.66243	0.0813712	5.61274	0.0780919	5.69877	0.0833465	5.56732	0.0794335	5.64901	0.0769296	5.6625	0.0855673	5.65735	0.0845958	5.74116	0.0844374	5.51208	0.0856712	5.51142	0.0834958	5.591	0.0852712	5.45903	0.0801465	5.53642	0.0827919	5.7871	0.0826088
ConcSwap	FALSE	5.47645	0.0777	5.28459	0.0768807			5.67074	0.0883655	5.65407	0.0825991	5.54047	0.085099	5.66667	0.0863435	5.56452	0.0773435	5.41741	0.0874768	5.63495	0.0814657	5.58292	0.0781879	5.67678	0.0834325	5.54313	0.0795323	5.62207	0.0770213	5.63708	0.0856547	5.63115	0.084699	5.71461	0.0845434	5.48837	0.0857657	5.48616	0.083599	5.56742	0.0853657	5.4331	0.0802325	5.51054	0.0828879	5.7627	0.0826991
1st Symbol-row	1	5.47345	0.0748	5.30771	0.0767087			5.64148	0.0883655	5.62625	0.0825991	5.51536	0.085099	5.63915	0.0863435	5.54042	0.0773435	5.3934	0.0874768	5.60732	0.0814657	5.55293	0.0781879	5.65466	0.0834325	5.51881	0.0795323	5.59498	0.0770213	5.61151	0.0856547	5.6048	0.084699	5.6879	0.0845434	5.46453	0.0857657	5.46075	0.083599	5.54369	0.0853657	5.40701	0.0802325	5.48451	0.0828879	5.73816	0.0826991
		5.55556	0.0773	5.33103	0.0765372			5.6124	0.0882451	5.59859	0.0825088	5.4904	0.0849958	5.61178	0.0862504	5.51646	0.0772504	5.36954	0.087375	5.57984	0.0813712	5.52312	0.0780919	5.63267	0.0833465	5.49463	0.0794335	5.56804	0.0769296	5.58609	0.0855673	5.57861	0.0845958	5.66135	0.0844374	5.44082	0.0856712	5.43549	0.0834958	5.52011	0.0852712	5.38108	0.0801465	5.45863	0.0827919	5.71377	0.0826088
		5.42005	0.0729	5.35453	0.0763662			5.58383	0.0880058	5.57141	0.0823294	5.46588	0.0847907	5.5849	0.0860652	5.49291	0.0770652	5.34609	0.0871728	5.55285	0.0811831	5.49383	0.0779011	5.61107	0.0831756	5.47087	0.0792369	5.54158	0.0767473	5.56112	0.0853935	5.55287	0.0843907	5.63527	0.0842265	5.41753	0.0854831	5.41068	0.0832907	5.49694	0.0850831	5.35561	0.0799756	5.4332	0.0826011	5.6898	0.0824294
		5.49753	0.0747	5.37822	0.0761957			5.55611	0.0876504	5.54505	0.0820628	5.44209	0.084486	5.55882	0.0857902	5.47007	0.0767902	5.32334	0.0868723	5.52667	0.0809039	5.46541	0.0776176	5.59011	0.0829217	5.44782	0.078945	5.5159	0.0764765	5.53689	0.0851354	5.5279	0.084086	5.60996	0.0839134	5.39493	0.0852039	5.3866	0.082986	5.47446	0.0848039	5.33089	0.0797217	5.40853	0.0823176	5.66655	0.0821628
		5.75043	0.075	5.40211	0.0760256			5.52956	0.087183	5.5198	0.0817122	5.4193	0.0840854	5.53384	0.0854285	5.44819	0.0764285	5.30155	0.0864773	5.50158	0.0805366	5.43819	0.0772448	5.57003	0.0825878	5.42575	0.078561	5.49131	0.0761204	5.51368	0.084796	5.50399	0.0836854	5.58572	0.0835017	5.37329	0.0848366	5.36354	0.0825854	5.45293	0.0844366	5.30722	0.0793878	5.38491	0.0819448	5.64427	0.0818122
		IsoLine	IsoLine	5.4262	0.0758561			5.5045	0.0866091	5.49596	0.0812818	5.39779	0.0835935	5.51025	0.0849844	5.42754	0.0759844	5.28098	0.0859922	5.4779	0.0800857	5.41249	0.076787	5.55108	0.0821779	5.40491	0.0780896	5.4681	0.0756831	5.49177	0.0843792	5.48141	0.0831935	5.56284	0.0829961	5.35286	0.0843857	5.34177	0.0820935	5.43261	0.0839857	5.28487	0.0789779	5.3626	0.081487	5.62325	0.0813818
				5.45048	0.0756871			5.48121	0.0859354	5.47381	0.0807766	5.3778	0.0830161	5.48834	0.0844631	5.40835	0.0754631	5.26187	0.0854228	5.4559	0.0795564	5.38862	0.0762497	5.53347	0.0816967	5.38554	0.0775363	5.44653	0.0751699	5.47141	0.08389	5.46043	0.0826161	5.54158	0.0824026	5.33387	0.0838564	5.32154	0.0815161	5.41372	0.0834564	5.26411	0.0784967	5.34188	0.0809497	5.60371	0.0808766
				5.47496	0.0755185			5.45997	0.0851699	5.45361	0.0802024	5.35958	0.0823599	5.46836	0.0838708	5.39085	0.0748708	5.24444	0.0847758	5.43584	0.0789549	5.36684	0.0756391	5.51741	0.0811499	5.36788	0.0769074	5.42686	0.0745866	5.45285	0.0833341	5.4413	0.0819599	5.52219	0.0817283	5.31656	0.0832549	5.30309	0.0808599	5.3965	0.0828549	5.24517	0.0779499	5.32298	0.0803391	5.5859	0.0803024
				5.49965	0.0753505			5.44104	0.0843215	5.4356	0.0795661	5.34332	0.0816327	5.45054	0.0832143	5.37525	0.0742143	5.2289	0.0840587	5.41795	0.0782883	5.34743	0.0749624	5.50309	0.0805439	5.35214	0.0762105	5.40932	0.0739402	5.43629	0.082718	5.42425	0.0812327	5.5049	0.0809809	5.30112	0.0825883	5.28664	0.0801327	5.38114	0.0821883	5.22828	0.0773439	5.30612	0.0796624	5.57001	0.0796661
				5.52455	0.0751829			5.42462	0.0834002	5.41998	0.0788751	5.32923	0.080843	5.43509	0.0825013	5.36172	0.0735013	5.21543	0.0832799	5.40244	0.0775644	5.3306	0.0742275	5.49067	0.0798858	5.33849	0.0754537	5.39411	0.0732382	5.42194	0.0820489	5.40946	0.080443	5.48992	0.0801692	5.28774	0.0818644	5.27238	0.079343	5.36783	0.0814644	5.21365	0.0766858	5.29151	0.0789275	5.55624	0.0789751
				5.54965	0.0750158			5.41092	0.0824167	5.40695	0.0781375	5.31747	0.08	5.4222	0.0817403	5.35043	0.0727403	5.20419	0.0824486	5.3895	0.0767917	5.31655	0.0734431	5.48031	0.0791833	5.32709	0.0746458	5.38142	0.0724889	5.40997	0.0813347	5.39712	0.0796	5.47741	0.0793028	5.27657	0.0810917	5.26048	0.0785	5.35672	0.0806917	5.20143	0.0759833	5.27932	0.0781431	5.54474	0.0782375
				5.57497	0.0748492			5.40009	0.0813826	5.39665	0.0773619	5.30818	0.0791136	5.41201	0.0809401	5.34151	0.0719401	5.1953	0.0815746	5.37927	0.0759792	5.30545	0.0726183	5.47212	0.0784447	5.31809	0.0737964	5.37139	0.071701	5.4005	0.0805838	5.38736	0.0787136	5.46752	0.0783918	5.26774	0.0802792	5.25108	0.0776136	5.34794	0.0798792	5.19177	0.0752447	5.26968	0.0773183	5.53566	0.0774619
				5.6005	0.0746831			5.39227	0.08031	5.38921	0.0765575	5.30146	0.0781943	5.40464	0.0801101	5.33506	0.0711101	5.18888	0.080668	5.37187	0.0751364	5.29743	0.0717627	5.46621	0.0776786	5.31158	0.0729154	5.36414	0.0708838	5.39366	0.0798049	5.38031	0.0777943	5.46038	0.0774469	5.26137	0.0794364	5.24428	0.0766943	5.34159	0.0790364	5.1848	0.0744786	5.26272	0.0764627	5.5291	0.0766575
				5.62624	0.0745174			5.38753	0.0792115	5.38471	0.0757336	5.2974	0.0772527	5.40019	0.0792601	5.33116	0.0702601	5.18499	0.0797395	5.3674	0.0742733	5.29257	0.0708866	5.46263	0.0768939	5.30765	0.072013	5.35976	0.0700469	5.38952	0.0790072	5.37605	0.0768527	5.45606	0.0764792	5.25751	0.0785733	5.24017	0.0757527	5.33775	0.0781733	5.18058	0.0736939	5.25851	0.0755866	5.52513	0.0758336
				5.65221	0.0743522			5.38595	0.0781	5.3832	0.0749	5.29604	0.0763	5.3987	0.0784	5.32985	0.0694	5.1837	0.0788	5.36591	0.0734	5.29095	0.07	5.46143	0.0761	5.30633	0.0711	5.35829	0.0692	5.38814	0.0782	5.37462	0.0759	5.45461	0.0755	5.25622	0.0777	5.23879	0.0748	5.33647	0.0773	5.17916	0.0729	5.2571	0.0747	5.5238	0.075
				5.6784	0.0741875			5.38753	0.0769885	5.38471	0.0740664	5.2974	0.0753473	5.40019	0.0775399	5.33116	0.0685399	5.18499	0.0778605	5.3674	0.0725267	5.29257	0.0691134	5.46263	0.0753061	5.30765	0.070187	5.35976	0.0683531	5.38952	0.0773928	5.37605	0.0749473	5.45606	0.0745208	5.25751	0.0768267	5.24017	0.0738473	5.33775	0.0764267	5.18058	0.0721061	5.25851	0.0738134	5.52513	0.0741664
				5.70481	0.0740233			5.39227	0.07589	5.38921	0.0732425	5.30146	0.0744057	5.40464	0.0766899	5.33506	0.0676899	5.18888	0.076932	5.37187	0.0716636	5.29743	0.0682373	5.46621	0.0745214	5.31158	0.0692846	5.36414	0.0675162	5.39366	0.0765951	5.38031	0.0740057	5.46038	0.0735531	5.26137	0.0759636	5.24428	0.0729057	5.34159	0.0755636	5.1848	0.0713214	5.26272	0.0729373	5.5291	0.0733425
				5.73145	0.0738596			5.40009	0.0748174	5.39665	0.0724381	5.30818	0.0734864	5.41201	0.0758599	5.34151	0.0668599	5.1953	0.0760254	5.37927	0.0708208	5.30545	0.0673817	5.47212	0.0737553	5.31809	0.0684036	5.37139	0.066699	5.4005	0.0758162	5.38736	0.0730864	5.46752	0.0726082	5.26774	0.0751208	5.25108	0.0719864	5.34794	0.0747208	5.19177	0.0705553	5.26968	0.0720817	5.53566	0.0725381
				5.75833	0.0736963			5.41092	0.0737833	5.40695	0.0716625	5.31747	0.0726	5.4222	0.0750597	5.35043	0.0660597	5.20419	0.0751514	5.3895	0.0700083	5.31655	0.0665569	5.48031	0.0730167	5.32709	0.0675542	5.38142	0.0659111	5.40997	0.0750653	5.39712	0.0722	5.47741	0.0716972	5.27657	0.0743083	5.26048	0.0711	5.35672	0.0739083	5.20143	0.0698167	5.27932	0.0712569	5.54474	0.0717625
				5.78543	0.0735335			5.42462	0.0727998	5.41998	0.0709249	5.32923	0.071757	5.43509	0.0742987	5.36172	0.0652987	5.21543	0.0743201	5.40244	0.0692356	5.3306	0.0657725	5.49067	0.0723142	5.33849	0.0667463	5.39411	0.0651618	5.42194	0.0743511	5.40946	0.071357	5.48992	0.0708308	5.28774	0.0735356	5.27238	0.070257	5.36783	0.0731356	5.21365	0.0691142	5.29151	0.0704725	5.55624	0.0710249
				5.81278	0.0733712			5.44104	0.0718785	5.4356	0.0702339	5.34332	0.0709673	5.45054	0.0735857	5.37525	0.0645857	5.2289	0.0735413	5.41795	0.0685117	5.34743	0.0650376	5.50309	0.0716561	5.35214	0.0659895	5.40932	0.0644598	5.43629	0.073682	5.42425	0.0705673	5.5049	0.0700191	5.30112	0.0728117	5.28664	0.0694673	5.38114	0.0724117	5.22828	0.0684561	5.30612	0.0697376	5.57001	0.0703339
				5.84036	0.0732093			5.45997	0.0710301	5.45361	0.0695976	5.35958	0.0702401	5.46836	0.0729292	5.39085	0.0639292	5.24444	0.0728242	5.43584	0.0678451	5.36684	0.0643609	5.51741	0.0710501	5.36788	0.0652926	5.42686	0.0638134	5.45285	0.0730659	5.4413	0.0698401	5.52219	0.0692717	5.31656	0.0721451	5.30309	0.0687401	5.3965	0.0717451	5.24517	0.0678501	5.32298	0.0690609	5.5859	0.0696976
				5.86819	0.0730479			5.48121	0.0702646	5.47381	0.0690234	5.3778	0.0695839	5.48834	0.0723369	5.40835	0.0633369	5.26187	0.0721772	5.4559	0.0672436	5.38862	0.0637503	5.53347	0.0705033	5.38554	0.0646637	5.44653	0.0632301	5.47141	0.07251	5.46043	0.0691839	5.54158	0.0685974	5.33387	0.0715436	5.32154	0.0680839	5.41372	0.0711436	5.26411	0.0673033	5.34188	0.0684503	5.60371	0.0691234
				5.89627	0.072887			5.5045	0.0695909	5.49596	0.0685182	5.39779	0.0690065	5.51025	0.0718156	5.42754	0.0628156	5.28098	0.0716078	5.4779	0.0667143	5.41249	0.063213	5.55108	0.0700221	5.40491	0.0641104	5.4681	0.0627169	5.49177	0.0720208	5.48141	0.0686065	5.56284	0.0680039	5.35286	0.0710143	5.34177	0.0675065	5.43261	0.0706143	5.28487	0.0668221	5.3626	0.067913	5.62325	0.0686182
				5.9246	0.0727265			5.52956	0.069017	5.5198	0.0680878	5.4193	0.0685146	5.53384	0.0713715	5.44819	0.0623715	5.30155	0.0711227	5.50158	0.0662634	5.43819	0.0627552	5.57003	0.0696122	5.42575	0.063639	5.49131	0.0622796	5.51368	0.071604	5.50399	0.0681146	5.58572	0.0674983	5.37329	0.0705634	5.36354	0.0670146	5.45293	0.0701634	5.30722	0.0664122	5.38491	0.0674552	5.64427	0.0681878
				5.95318	0.0725665			5.55611	0.0685496	5.54505	0.0677372	5.44209	0.068114	5.55882	0.0710098	5.47007	0.0620098	5.32334	0.0707277	5.52667	0.0658961	5.46541	0.0623824	5.59011	0.0692783	5.44782	0.063255	5.5159	0.0619235	5.53689	0.0712646	5.5279	0.067714	5.60996	0.0670866	5.39493	0.0701961	5.3866	0.066614	5.47446	0.0697961	5.33089	0.0660783	5.40853	0.0670824	5.66655	0.0678372
				5.98201	0.072407			5.58383	0.0681942	5.57141	0.0674706	5.46588	0.0678093	5.5849	0.0707348	5.49291	0.0617348	5.34609	0.0704272	5.55285	0.0656169	5.49383	0.0620989	5.61107	0.0690244	5.47087	0.0629631	5.54158	0.0616527	5.56112	0.0710065	5.55287	0.0674093	5.63527	0.0667735	5.41753	0.0699169	5.41068	0.0663093	5.49694	0.0695169	5.35561	0.0658244	5.4332	0.0667989	5.6898	0.0675706
				6.01111	0.0722479			5.6124	0.0679549	5.59859	0.0672912	5.4904	0.0676042	5.61178	0.0705496	5.51646	0.0615496	5.36954	0.070225	5.57984	0.0654288	5.52312	0.0619081	5.63267	0.0688535	5.49463	0.0627665	5.56804	0.0614704	5.58609	0.0708327	5.57861	0.0672042	5.66135	0.0665626	5.44082	0.0697288	5.43549	0.0661042	5.52011	0.0693288	5.38108	0.0656535	5.45863	0.0666081	5.71377	0.0673912
				6.04047	0.0720892			5.64148	0.0678345	5.62625	0.0672009	5.51536	0.067501	5.63915	0.0704565	5.54042	0.0614565	5.3934	0.0701232	5.60732	0.0653343	5.55293	0.0618121	5.65466	0.0687675	5.51881	0.0626677	5.59498	0.0613787	5.61151	0.0707453	5.6048	0.067101	5.6879	0.0664566	5.46453	0.0696343	5.46075	0.066001	5.54369	0.0692343	5.40701	0.0655675	5.48451	0.0665121	5.73816	0.0673009
				6.0701	0.0719311			5.67074	0.0678345	5.65407	0.0672009	5.54047	0.067501	5.66667	0.0704565	5.56452	0.0614565	5.41741	0.0701232	5.63495	0.0653343	5.58292	0.0618121	5.67678	0.0687675	5.54313	0.0626677	5.62207	0.0613787	5.63708	0.0707453	5.63115	0.067101	5.71461	0.0664566	5.48837	0.0696343	5.48616	0.066001	5.56742	0.0692343	5.4331	0.0655675	5.51054	0.0665121	5.7627	0.0673009
				6.1	0.0717734			5.69982	0.0679549	5.68173	0.0672912	5.56543	0.0676042	5.69404	0.0705496	5.58849	0.0615496	5.44127	0.070225	5.66243	0.0654288	5.61274	0.0619081	5.69877	0.0688535	5.56732	0.0627665	5.64901	0.0614704	5.6625	0.0708327	5.65735	0.0672042	5.74116	0.0665626	5.51208	0.0697288	5.51142	0.0661042	5.591	0.0693288	5.45903	0.0656535	5.53642	0.0666081	5.7871	0.0673912
				6.1	0.0717734			5.72838	0.0681942	5.7089	0.0674706	5.58995	0.0678093	5.72092	0.0707348	5.61203	0.0617348	5.46472	0.0704272	5.68942	0.0656169	5.64203	0.0620989	5.72038	0.0690244	5.59107	0.0629631	5.67547	0.0616527	5.68748	0.0710065	5.68308	0.0674093	5.76724	0.0667735	5.53537	0.0699169	5.53623	0.0663093	5.61417	0.0695169	5.4845	0.0658244	5.56185	0.0667989	5.81106	0.0675706
				IsoLine	IsoLine			5.75611	0.0685496	5.73527	0.0677372	5.61374	0.068114	5.747	0.0710098	5.63487	0.0620098	5.48747	0.0707277	5.7156	0.0658961	5.67045	0.0623824	5.74134	0.0692783	5.61412	0.063255	5.70115	0.0619235	5.71171	0.0712646	5.70805	0.067714	5.79255	0.0670866	5.55797	0.0701961	5.56031	0.066614	5.63665	0.0697961	5.50922	0.0660783	5.58652	0.0670824	5.83432	0.0678372
								5.78265	0.069017	5.76052	0.0680878	5.63653	0.0685146	5.77199	0.0713715	5.65675	0.0623715	5.50926	0.0711227	5.74069	0.0662634	5.69767	0.0627552	5.76141	0.0696122	5.6362	0.063639	5.72574	0.0622796	5.73492	0.071604	5.73197	0.0681146	5.81678	0.0674983	5.57961	0.0705634	5.58337	0.0670146	5.65818	0.0701634	5.53289	0.0664122	5.61014	0.0674552	5.85659	0.0681878
								5.80772	0.0695909	5.78436	0.0685182	5.65804	0.0690065	5.79557	0.0718156	5.6774	0.0628156	5.52983	0.0716078	5.76437	0.0667143	5.72337	0.063213	5.78037	0.0700221	5.65704	0.0641104	5.74895	0.0627169	5.75683	0.0720208	5.75454	0.0686065	5.83967	0.0680039	5.60004	0.0710143	5.60514	0.0675065	5.67851	0.0706143	5.55524	0.0668221	5.63245	0.067913	5.87762	0.0686182
								5.83101	0.0702646	5.80651	0.0690234	5.67803	0.0695839	5.81748	0.0723369	5.69659	0.0633369	5.54894	0.0721772	5.78637	0.0672436	5.74724	0.0637503	5.79798	0.0705033	5.6764	0.0646637	5.77052	0.0632301	5.77718	0.07251	5.77552	0.0691839	5.86093	0.0685974	5.61903	0.0715436	5.62537	0.0680839	5.69739	0.0711436	5.576	0.0673033	5.65318	0.0684503	5.89715	0.0691234
								5.85224	0.0710301	5.82671	0.0695976	5.69626	0.0702401	5.83747	0.0729292	5.71409	0.0639292	5.56637	0.0728242	5.80643	0.0678451	5.76901	0.0643609	5.81404	0.0710501	5.69406	0.0652926	5.79019	0.0638134	5.79575	0.0730659	5.79465	0.0698401	5.88032	0.0692717	5.63634	0.0721451	5.64382	0.0687401	5.71461	0.0717451	5.59494	0.0678501	5.67208	0.0690609	5.91497	0.0696976
								5.87118	0.0718785	5.84472	0.0702339	5.71251	0.0709673	5.85529	0.0735857	5.7297	0.0645857	5.58191	0.0735413	5.82432	0.0685117	5.78843	0.0650376	5.82836	0.0716561	5.70981	0.0659895	5.80773	0.0644598	5.8123	0.073682	5.81171	0.0705673	5.8976	0.0700191	5.65178	0.0728117	5.66027	0.0694673	5.72997	0.0724117	5.61182	0.0684561	5.68893	0.0697376	5.93085	0.0703339
								5.8876	0.0727998	5.86033	0.0709249	5.7266	0.071757	5.87073	0.0742987	5.74322	0.0652987	5.59538	0.0743201	5.83983	0.0692356	5.80526	0.0657725	5.84077	0.0723142	5.72346	0.0667463	5.82294	0.0651618	5.82665	0.0743511	5.8265	0.071357	5.91259	0.0708308	5.66516	0.0735356	5.67452	0.070257	5.74328	0.0731356	5.62646	0.0691142	5.70354	0.0704725	5.94462	0.0710249
								5.9013	0.0737833	5.87337	0.0716625	5.73836	0.0726	5.88363	0.0750597	5.75451	0.0660597	5.60662	0.0751514	5.85277	0.0700083	5.81931	0.0665569	5.85113	0.0730167	5.73485	0.0675542	5.83563	0.0659111	5.83863	0.0750653	5.83884	0.0722	5.9251	0.0716972	5.67633	0.0743083	5.68643	0.0711	5.7544	0.0739083	5.63868	0.0698167	5.71573	0.0712569	5.95612	0.0717625
								5.91213	0.0748174	5.88367	0.0724381	5.74765	0.0734864	5.89381	0.0758599	5.76344	0.0668599	5.61551	0.0760254	5.863	0.0708208	5.83041	0.0673817	5.85932	0.0737553	5.74386	0.0684036	5.84566	0.066699	5.84809	0.0758162	5.84859	0.0730864	5.93499	0.0726082	5.68516	0.0751208	5.69583	0.0719864	5.76318	0.0747208	5.64833	0.0705553	5.72537	0.0720817	5.9652	0.0725381
								5.91995	0.07589	5.89111	0.0732425	5.75437	0.0744057	5.90118	0.0766899	5.76988	0.0676899	5.62193	0.076932	5.8704	0.0716636	5.83843	0.0682373	5.86524	0.0745214	5.75036	0.0692846	5.85291	0.0675162	5.85493	0.0765951	5.85564	0.0740057	5.94213	0.0735531	5.69154	0.0759636	5.70263	0.0729057	5.76952	0.0755636	5.65531	0.0713214	5.73233	0.0729373	5.97177	0.0733425
								5.92469	0.0769885	5.89561	0.0740664	5.75843	0.0753473	5.90563	0.0775399	5.77378	0.0685399	5.62582	0.0778605	5.87487	0.0725267	5.84328	0.0691134	5.86882	0.0753061	5.7543	0.070187	5.85729	0.0683531	5.85907	0.0773928	5.8599	0.0749473	5.94645	0.0745208	5.69539	0.0768267	5.70674	0.0738473	5.77336	0.0764267	5.65953	0.0721061	5.73654	0.0738134	5.97574	0.0741664
								5.92627	0.0781	5.89712	0.0749	5.75979	0.0763	5.90712	0.0784	5.77509	0.0694	5.62711	0.0788	5.87636	0.0734	5.84491	0.07	5.87001	0.0761	5.75561	0.0711	5.85876	0.0692	5.86046	0.0782	5.86133	0.0759	5.9479	0.0755	5.69669	0.0777	5.70811	0.0748	5.77464	0.0773	5.66094	0.0729	5.73795	0.0747	5.97707	0.075
								ErrEll	ErrEll	ErrEll	ErrEll	ErrEll	ErrEll	ErrEll	ErrEll	ErrEll	ErrEll	ErrEll	ErrEll	ErrEll	ErrEll	ErrEll	ErrEll	ErrEll	ErrEll	ErrEll	ErrEll	ErrEll	ErrEll	ErrEll	ErrEll	ErrEll	ErrEll	ErrEll	ErrEll	ErrEll	ErrEll	ErrEll	ErrEll	ErrEll	ErrEll	ErrEll	ErrEll	ErrEll	ErrEll	ErrEll	ErrEll

## Sheet: PlotDat6
Source sheet	U-Pb standards	0.2	1062.91	1	1049.47	37.7981	0.85	1011.67
Plot name	Average5	20.8	1062.91	2	1052.21	36.1393	1.15	1011.67
Plot Type	15			3	1071.89	33.8455	1.15	1087.27
1st free col	8			4	1050.02	35.6038	0.85	1087.27
Sigma Level	2			5	1067.52	32.2296	0.85	1011.67
Absolute Errs	TRUE			6	1094.23	33.7284	ErrBox	ErrBox
Symbol Type	1			7	1055.49	36.1209	1.85	1016.07
Inverse Plot	FALSE			8	1064.79	39.8944	2.15	1016.07
Color Plot	TRUE			9	1047.83	28.4926	2.15	1088.35
3D plot	FALSE			10	1071.34	32.7565	1.85	1088.35
Linear	FALSE			11	1057.68	35.5615	1.85	1016.07
Data Range	J2:K21			12	1054.94	33.3872	ErrBox	ErrBox
Filled Symbols	TRUE			13	1056.04	34.476	2.85	1038.04
ConcAge	FALSE			14	1041.8	34.0039	3.15	1038.04
ConcSwap	FALSE			15	1081.16	32.7066	3.15	1105.73
1st Symbol-row	1			16	1081.71	34.8841	2.85	1105.73
				17	1066.97	31.686	2.85	1038.04
				18	1091.51	36.4639	ErrBox	ErrBox
				19	1077.35	35.4532	3.85	1014.41
				20	1033.56	30.7524	4.15	1014.41
				IsoLine	IsoLine	IsoLine	4.15	1085.62
							3.85	1085.62
							3.85	1014.41
							ErrBox	ErrBox
							4.85	1035.29
							5.15	1035.29
							5.15	1099.75
							4.85	1099.75
							4.85	1035.29
							ErrBox	ErrBox
							5.85	1060.5
							6.15	1060.5
							6.15	1127.96
							5.85	1127.96
							5.85	1060.5
							ErrBox	ErrBox
							6.85	1019.37
							7.15	1019.37
							7.15	1091.61
							6.85	1091.61
							6.85	1019.37
							ErrBox	ErrBox
							7.85	1024.89
							8.15	1024.89
							8.15	1104.68
							7.85	1104.68
							7.85	1024.89
							ErrBox	ErrBox
							8.85	1019.33
							9.15	1019.33
							9.15	1076.32
							8.85	1076.32
							8.85	1019.33
							ErrBox	ErrBox
							9.85	1038.59
							10.15	1038.59
							10.15	1104.1
							9.85	1104.1
							9.85	1038.59
							ErrBox	ErrBox
							10.85	1022.12
							11.15	1022.12
							11.15	1093.24
							10.85	1093.24
							10.85	1022.12
							ErrBox	ErrBox
							11.85	1021.56
							12.15	1021.56
							12.15	1088.33
							11.85	1088.33
							11.85	1021.56
							ErrBox	ErrBox
							12.85	1021.56
							13.15	1021.56
							13.15	1090.52
							12.85	1090.52
							12.85	1021.56
							ErrBox	ErrBox
							13.85	1007.79
							14.15	1007.79
							14.15	1075.8
							13.85	1075.8
							13.85	1007.79
							ErrBox	ErrBox
							14.85	1048.46
							15.15	1048.46
							15.15	1113.87
							14.85	1113.87
							14.85	1048.46
							ErrBox	ErrBox
							15.85	1046.82
							16.15	1046.82
							16.15	1116.59
							15.85	1116.59
							15.85	1046.82
							ErrBox	ErrBox
							16.85	1035.29
							17.15	1035.29
							17.15	1098.66
							16.85	1098.66
							16.85	1035.29
							ErrBox	ErrBox
							17.85	1055.05
							18.15	1055.05
							18.15	1127.98
							17.85	1127.98
							17.85	1055.05
							ErrBox	ErrBox
							18.85	1041.89
							19.15	1041.89
							19.15	1112.8
							18.85	1112.8
							18.85	1041.89
							ErrBox	ErrBox
							19.85	1002.81
							20.15	1002.81
							20.15	1064.32
							19.85	1064.32
							19.85	1002.81
							ErrBox	ErrBox

## Sheet: U-Pb standards
Summary
Standard	Age (Ma)*	± 2σ	MSWD	p	n		* 207Pb/206Pb Age for OG1, 206Pb/238U Age for all other standards
91500 (Primary)	1062.9	7.5	0.95	0.42	20 of 20
Published age	1062.4	0.4	Wiedenbeck et al., 1995
GJ-1	602.5	3.5	0.91	0.57	20 of 20
Published age	601.95	0.4	Jackson et al., 2004; Horstwood et al., 2016
Plešovice	340.1	2.4	0.98	0.46	12 of 12
Published age	337.13	0.37	Slama et al., 2008
OG1	3462	17	0.47	0.97	20 of 20
Published age	3465.4	0.6	Stern et al., 2009
Individual Data Points
Spot	U (ppm)	Th (ppm)	Th/U	f206 (%)	238U/206Pb	± 2σ	207Pb/206Pb	± 2σ	206Pb/238U Age (Ma)	± 2σ	207Pb/206Pb Age (Ma)	± 2σ	Disc. (%)
91500 - 1	79.9	29.9	0.374218	0	5.65611	0.220742	0.0781	0.0084	1049.47	37.7981	1148.52	213.626	8.62462
91500 - 2	80.4	30.11	0.374502	0	5.64016	0.209955	0.0749	0.0063	1052.21	36.1393	1064.91	169.15	1.19328
91500 - 3	79.6	30.02	0.377136	0	5.52792	0.189459	0.0763	0.0072	1071.89	33.8455	1102.05	188.718	2.73707
91500 - 4	80.2	29.8	0.371571	0.0283085	5.65291	0.20771	0.0784	0.0065	1050.02	35.6038	1156.14	164.489	9.17873
91500 - 5	79.8	30	0.37594	0	5.55247	0.181897	0.0694	0.0065	1067.52	32.2296	909.727	192.873	-17.3452
91500 - 6	80.3	30.07	0.374471	0.0704721	5.40541	0.181154	0.0788	0.0071	1094.23	33.7284	1166.22	178.497	6.17312
91500 - 7	79.9	30.02	0.37572	0.0404224	5.62113	0.208541	0.0734	0.0066	1055.49	36.1209	1024.11	181.941	-3.06459
91500 - 8	79.9	29.9	0.374218	0	5.56793	0.226313	0.07	0.0067	1064.79	39.8944	927.43	196.562	-14.8108
91500 - 9	80.1	30	0.374532	0.0514938	5.66572	0.166922	0.0761	0.006	1047.83	28.4926	1096.8	157.801	4.46542
91500 - 10	80	30.2	0.3775	0.0847834	5.53097	0.18355	0.0711	0.0069	1071.34	32.7565	959.371	198.316	-11.6715
91500 - 11	80.2	29.9	0.372818	0.0514406	5.60853	0.204461	0.0692	0.0064	1057.68	35.5615	903.781	190.631	-17.0284
91500 - 12	79.8	29.97	0.375564	0	5.6243	0.19296	0.0782	0.0061	1054.94	33.3872	1151.07	154.877	8.35063
91500 - 13	80	30.06	0.37575	0	5.61798	0.198839	0.0759	0.0072	1056.04	34.476	1091.53	190.01	3.25177
91500 - 14	80.3	30.04	0.374097	0.0850468	5.70125	0.201527	0.0755	0.0074	1041.8	34.0039	1080.94	196.633	3.62143
91500 - 15	79.5	29.94	0.376604	0.0564478	5.47645	0.179949	0.0777	0.0066	1081.16	32.7066	1138.32	168.966	5.02104
91500 - 16	80.2	30.04	0.374564	0.0313502	5.47345	0.191736	0.0748	0.0072	1081.71	34.8841	1062.23	193.65	-1.83392
91500 - 17	80	30.1	0.37625	0.0565323	5.55556	0.179012	0.0773	0.0066	1066.97	31.686	1128.04	170.098	5.41374
91500 - 18	79.8	29.82	0.373684	0	5.42005	0.196826	0.0729	0.006	1091.51	36.4639	1010.26	166.886	-8.04241
91500 - 19	80.1	30.18	0.376779	0	5.49753	0.196448	0.0747	0.0067	1077.35	35.4532	1059.54	180.517	-1.68096
91500 - 20	80	29.97	0.374625	0.121644	5.75043	0.185178	0.075	0.0063	1033.56	30.7524	1067.6	168.856	3.1879
Spot	U (ppm)	Th (ppm)	Th/U	f206 (%)	238U/206Pb	± 2σ	207Pb/206Pb	± 2σ	206Pb/238U Age (Ma)	± 2σ	207Pb/206Pb Age (Ma)	± 2σ	Disc. (%)
GJ1 - 1	412	10.29	0.0249757	0	10.4058	0.281531	0.0591	0.004	591.513	15.2912	569.803	147.283	-3.81001
GJ1 - 2	394.2	9.65	0.02448	0.0243393	10.3627	0.279202	0.0597	0.0036	593.865	15.2857	591.744	130.739	-0.35852
GJ1 - 3	416.2	10.51	0.0252523	0	10.352	0.278624	0.0591	0.004	594.453	15.2842	569.803	147.283	-4.32596
GJ1 - 4	430	10.96	0.0254884	0	10.395	0.280946	0.0584	0.0038	592.101	15.2898	543.818	142.22	-8.87857
GJ1 - 5	425	10.76	0.0253176	0	10.395	0.291752	0.0618	0.0045	592.101	15.8779	666.232	155.924	11.1269
GJ1 - 6	413	10.24	0.0247942	0	10.2564	0.294543	0.062	0.0041	599.741	16.4465	673.147	141.444	10.9048
GJ1 - 7	421	10.33	0.0245368	0.0253771	10.3199	0.298202	0.0613	0.004	596.216	16.4555	648.812	140.133	8.10645
GJ1 - 8	427	10.58	0.0247775	0	10.2669	0.284607	0.0605	0.004	599.154	15.8605	620.534	142.655	3.44546
GJ1 - 9	410.3	9.85	0.0240068	0.0300901	10.1937	0.28056	0.0609	0.004	603.265	15.8504	634.736	141.383	4.95818
GJ1 - 10	401	9.84	0.0245387	0	10.1523	0.278286	0.0625	0.0042	605.613	15.8447	690.303	143.33	12.2685
GJ1 - 11	405.2	9.98	0.0246298	0	10.0705	0.27382	0.0603	0.0037	610.306	15.8331	613.385	132.552	0.502095
GJ1 - 12	414.5	10.28	0.024801	0.0433132	10.2249	0.271829	0.0603	0.0041	601.503	15.2675	613.385	146.882	1.93715
GJ1 - 13	407	10.18	0.0250123	0	10.1317	0.277159	0.0608	0.0044	606.786	15.8418	631.197	155.869	3.86746
GJ1 - 14	399	9.7	0.0243108	0	10.0908	0.274926	0.0609	0.0041	609.132	15.836	634.736	144.918	4.03375
GJ1 - 15	408.5	9.82	0.0240392	0	10.1523	0.288593	0.0601	0.004	605.613	16.4315	606.204	143.949	0.0975817
GJ1 - 16	402	10.07	0.0250498	0	9.99001	0.279441	0.059	0.0039	614.995	16.4076	566.117	143.934	-8.63393
GJ1 - 17	407	10.16	0.0249631	0	10.0908	0.274926	0.0579	0.0041	609.132	15.836	524.994	155.27	-16.0266
GJ1 - 18	418.7	10.45	0.0249582	0	10.02	0.261043	0.0567	0.0037	613.237	15.2398	478.89	144.222	-28.0537
GJ1 - 19	413	9.49	0.0229782	0	10.0705	0.263679	0.0591	0.0042	610.306	15.2467	569.803	154.647	-7.10814
GJ1 - 20	422.7	10.84	0.0256447	0	10.1937	0.28056	0.0592	0.0043	603.265	15.8504	573.481	157.964	-5.19348
Spot	U (ppm)	Th (ppm)	Th/U	f206 (%)	238U/206Pb	± 2σ	207Pb/206Pb	± 2σ	206Pb/238U Age (Ma)	± 2σ	207Pb/206Pb Age (Ma)	± 2σ	Disc. (%)
ples - 1	1092	156.9	0.143681	0	18.6081	0.484767	0.0573	0.0038	337.442	8.56472	502.108	145.986	32.7949
ples - 2	712	67.9	0.0953652	0.0259811	18.6846	0.48876	0.0518	0.0032	336.096	8.56651	275.561	141.508	-21.968
ples - 3	1312	127.2	0.0969512	0	18.5117	0.479754	0.055	0.0034	339.155	8.56244	411.217	138.238	17.5241
ples - 4	1578	164.3	0.104119	0	18.6324	0.486032	0.0524	0.0032	337.014	8.56529	301.879	139.229	-11.6388
ples - 5	2910	410	0.140893	0.00454201	18.1686	0.429128	0.0524	0.0028	345.39	7.94316	301.879	121.825	-14.4135
ples - 6	2849	393	0.137943	0.00283953	18.3486	0.471341	0.0533	0.0029	342.09	8.55855	340.571	123.193	-0.446097
ples - 7	2556	329	0.128717	0	18.1127	0.426489	0.0533	0.003	346.429	7.94187	340.571	127.441	-1.7201
ples - 8	868	89.9	0.103571	0	18.3016	0.468929	0.054	0.0035	342.946	8.55741	370.037	145.991	7.32109
ples - 9	778	79.2	0.101799	0	18.8359	0.49671	0.0504	0.0036	333.465	8.57	212.441	165.499	-56.9682
ples - 10	841	99	0.117717	0.0252593	18.6881	0.488943	0.0556	0.0036	336.035	8.56658	435.429	144.181	22.8267
ples - 11	946	102	0.107822	0	18.4775	0.477983	0.0511	0.0035	339.767	8.56163	244.307	157.782	-39.0734
ples - 12	992	111.3	0.112198	0	18.2682	0.467217	0.0517	0.0034	343.557	8.55659	271.133	150.763	-26.7116
Spot	U (ppm)	Th (ppm)	Th/U	f206 (%)	238U/206Pb	± 2σ	207Pb/206Pb	± 2σ	206Pb/238U Age (Ma)	± 2σ	207Pb/206Pb Age (Ma)	± 2σ	Disc. (%)
OGC - 1	299.3	352.6	1.17808	0	1.4039	0.035477	0.2974	0.014	3467.12	67.7683	3456.04	72.9936	-0.32079
OGC - 2	168.6	208.2	1.23488	0	1.42247	0.0384453	0.2992	0.015	3432.02	71.9242	3465.39	77.6838	0.963068
OGC - 3	254.5	206	0.80943	0	1.52765	0.0396732	0.2962	0.015	3246.15	66.2353	3449.77	78.5604	5.90223
OGC - 4	224.6	235.2	1.0472	0	1.38966	0.036692	0.3002	0.015	3494.55	71.2298	3470.56	77.3958	-0.691199
OGC - 5	221.5	225.4	1.01761	0	1.4573	0.0382271	0.2974	0.015	3368.11	68.8174	3456.04	78.2074	2.54424
OGC - 6	298	370	1.24161	0.00394342	1.41703	0.0361437	0.2984	0.015	3442.23	68.0306	3461.24	77.9157	0.549316
OGC - 7	125.8	86.5	0.687599	0.00389699	1.38889	0.0405093	0.3024	0.015	3496.05	78.7101	3481.86	76.7696	-0.407322
OGC - 8	172	170.4	0.990698	0	1.39276	0.0407353	0.3018	0.015	3488.55	78.8017	3478.79	76.9394	-0.28044
OGC - 9	120.9	84.3	0.69727	0.00453776	1.41044	0.041776	0.3029	0.016	3454.69	79.2168	3484.42	81.7372	0.853314
OGC - 10	179.7	126.1	0.701725	0.00293196	1.39626	0.0370412	0.2943	0.015	3481.79	71.371	3439.78	79.1257	-1.22131
OGC - 11	164.5	172.3	1.04742	0.00482257	1.36612	0.0373257	0.3018	0.015	3540.87	74.4423	3478.79	76.9394	-1.78441
OGC - 12	174.4	149.2	0.855505	0.00372414	1.36054	0.0388727	0.294	0.015	3552.02	78.0296	3438.2	79.2156	-3.31066
OGC - 13	120.9	85.4	0.706369	0.0150368	1.28535	0.0446072	0.319	0.018	3709.84	97.9002	3564.33	86.8152	-4.0825
OGC - 14	186	134.2	0.721505	0	1.38217	0.0362975	0.3013	0.015	3509.15	71.0686	3476.22	77.0815	-0.94724
OGC - 15	166	139.9	0.842771	0.00264593	1.37931	0.0399524	0.2971	0.015	3514.76	78.482	3454.47	78.2954	-1.74524
OGC - 16	115.9	103.3	0.891286	0	1.33511	0.0392156	0.2945	0.015	3603.83	81.0913	3440.83	79.0658	-4.73716
OGC - 17	173.8	158.2	0.910242	0.00231205	1.36351	0.0353242	0.2952	0.015	3546.08	70.6628	3444.52	78.8569	-2.94836
OGC - 18	460.6	587.2	1.27486	0	1.36743	0.0336575	0.2971	0.014	3538.26	67.0246	3454.47	73.0757	-2.4255
OGC - 19	332.7	448	1.34656	0	1.34427	0.034334	0.2938	0.014	3585	70.2372	3437.14	73.9907	-4.30201
OGC - 20	150.6	137.6	0.913679	0.00384504	1.3587	0.0387671	0.2936	0.015	3555.74	77.9846	3436.08	79.3359	-3.48229

## Sheet: Traces standards
Spot	Zr_ppm_m90	Zr_ppm_m90_Int2SE	Zr_ppm_m91	Zr_ppm_m91_Int2SE	La_ppm_m139	La_ppm_m139_Int2SE	Ce_ppm_m140	Ce_ppm_m140_Int2SE	Pr_ppm_m141	Pr_ppm_m141_Int2SE	Nd_ppm_m146	Nd_ppm_m146_Int2SE	Sm_ppm_m147	Sm_ppm_m147_Int2SE	Eu_ppm_m153	Eu_ppm_m153_Int2SE	Gd_ppm_m157	Gd_ppm_m157_Int2SE	Dy_ppm_m163	Dy_ppm_m163_Int2SE	Yb_ppm_m172	Yb_ppm_m172_Int2SE	Lu_ppm_m175	Lu_ppm_m175_Int2SE	Pb_ppm_m208	Pb_ppm_m208_Int2SE	Th_ppm_m232	Th_ppm_m232_Int2SE	U_ppm_m238	U_ppm_m238_Int2SE
612 - 1.d	37.5505	3.5024	38.2357	7.62611	36.4462	1.86632	38.6265	2.03938	38.4621	1.784	35.4917	3.87214	43.3748	5.96393	36.0978	2.57372	38.7468	4.74595	32.6956	2.68211	38.5254	2.90287	37.5392	1.83455	38.7028	1.56048	36.8414	1.30294	37.5016	1.17307
612 - 2.d	37.0131	3.81614	34.2836	6.27416	37.2112	1.64655	36.9293	2.24289	40.0195	1.61391	33.0054	3.63826	39.881	4.88503	34.5192	2.03068	37.2611	4.69498	39.2587	3.56499	38.5973	3.96161	35.966	1.72872	39.6655	1.47174	39.191	1.34755	38.2481	1.56359
612 - 3.d	41.6528	3.72391	39.6431	6.58558	34.7283	1.87721	38.2371	2.21713	37.3404	1.84613	32.7682	3.79792	38.3477	5.02911	35.1607	2.58806	37.7129	4.28838	38.2163	3.50964	37.756	3.53241	37.4455	1.93548	39.6123	1.77006	38.4728	1.48363	38.0211	1.4094
612 - 4.d	38.7047	3.78029	39.0643	8.54484	34.7881	1.673	38.3328	1.82495	37.6195	2.11883	32.6243	4.24827	41.6386	5.7644	34.2251	1.7142	37.7416	4.78949	34.5303	3.61865	42.2359	3.86965	36.6504	2.12575	39.4261	1.49711	37.4504	1.22029	37.346	1.3227
612 - 5.d	33.6353	4.21615	38.5634	6.65357	35.7714	2.01011	36.565	2.00121	36.5645	2.03059	36.89	5.22519	37.4912	5.23355	33.3153	2.13813	35.5282	3.58671	34.8638	2.75925	34.7259	2.91373	36.46	1.66893	37.3652	1.03828	37.0639	1.05487	36.3797	1.2041
612 - 6.d	38.3821	3.11376	35.7706	6.51587	36.4996	1.99829	37.8588	2.07296	37.4188	1.97843	35.7619	4.45593	34.7969	3.92222	34.6781	2.63534	43.5197	4.74867	34.7127	3.36354	35.4309	3.70929	36.6047	1.56764	38.7071	1.06068	38.1455	1.17408	36.4709	1.18634
612 - 7.d	38.0068	3.74942	41.8079	7.17558	35.8282	1.91093	38.0587	2.1769	37.8361	1.98687	34.2171	4.5014	34.5187	4.17537	35.2387	2.4348	38.043	5.17137	38.9565	4.49144	36.3565	3.47443	37.2047	2.06723	38.2757	1.36245	38.5709	1.48752	37.8634	1.2131
612 - 8.d	40.2244	4.72206	39.8948	7.08028	35.5189	1.7905	38.7683	2.34473	37.983	1.70128	32.5277	4.09884	39.7339	5.02985	32.2888	2.41753	37.9141	5.58254	32.0564	3.44315	39.7127	3.78064	37.0329	2.17573	37.5729	1.24905	37.8298	1.28987	37.1177	1.19814
612 - 9.d	37.7361	3.46837	40.9961	7.35267	36.5575	1.77328	38.841	2.18924	38.2337	1.60415	36.1374	5.35236	37.5102	4.55839	35.0491	2.66476	40.8044	4.34864	37.6933	3.7859	38.2802	3.31107	36.2136	2.21948	38.8206	1.30447	38.3523	1.02532	37.3879	1.36562
612 - 10.d	37.3067	3.76051	37.4607	7.11629	36.1624	2.08479	37.8876	2.42395	35.2294	2.13489	36.3901	4.39839	36.2342	4.58507	35.948	2.09407	34.6885	3.72725	36.9606	3.67652	37.6603	2.68774	35.7968	1.61124	37.9334	1.27754	35.717	1.24568	37.596	1.47044
Average	38.0212		38.572		35.9512		38.0105		37.6707		34.5814		38.3527		34.6521		38.196		35.9944		37.9281		36.6914		38.6082		37.7635		37
Accepted Value	37.9		37.9		36		38.4		37.9		35.5		37.7		35.6		37.3		35.5		39.2		37		38.57		37.79		37.38
% Difference	0.0798487		0.439392		0.0339232		0.254871		0.151719		0.655401		0.429119		0.674661		0.593434		0.345774		0.824536		0.209397		0.0247207		0.0175409		0.255445

## Sheet: Hf standards
Summary
Standard	176Hf/177Hf	± 2σ	MSWD	p	n
Mud tank (Primary)	0.282507	1e-05	0.05	1	16 of 16
Published value	0.282507	6e-06	Woodhead & Hergt (2005)
91500	0.28229	1.6e-05	1.18	0.27	19 of 20
Published value	0.282305	6e-06	Blichert-Toft (2008)
GJ-1	0.28202	1.2e-05	0.72	0.78	18 of 19
Published value	0.282	2.3e-05	Morel et al. (2008)
Plešovice	0.282488	2e-05	1.7	0.1	9 of 12
Published value	0.282482	1.2e-05	Slama et al. (2008)
Individual Data Points
Spot	178Hf/177Hf	± 2σ	180Hf/177Hf	± 2σ	176Yb/177Hf	± 2σ	176Lu/177Hf	± 2σ	176Hf/177Hf	± 2σ
mud - 1	1.46737	0.0002	1.88679	0.00018	0.001099	1.9e-05	2.328e-05	4.9e-07	0.282506	4.2e-05
mud - 4	1.46729	0.00014	1.88675	0.00015	0.001	1.8e-05	2.047e-05	4.6e-07	0.282513	4.6e-05
mud - 5	1.46744	0.00015	1.8868	0.00021	0.001023	1.6e-05	2.227e-05	4.5e-07	0.282501	4.6e-05
mud - 6	1.46741	0.0002	1.88678	0.00021	0.001075	1.7e-05	2.269e-05	6.2e-07	0.282511	4.1e-05
mud - 7	1.46727	0.00018	1.88676	0.00017	0.00102	1.6e-05	2.191e-05	5.3e-07	0.282497	4.6e-05
mud - 8	1.46729	0.00016	1.88671	0.00011	0.001084	1.5e-05	2.255e-05	5.2e-07	0.282516	4.7e-05
mud - 9	1.46732	0.00017	1.88686	0.00019	0.000935	1.8e-05	2.062e-05	5.8e-07	0.282509	5.4e-05
mud - 10	1.4674	0.00019	1.8868	0.00016	0.001005	1.4e-05	2.158e-05	4e-07	0.282507	4.7e-05
mud - 11	1.46737	0.00017	1.88679	0.00023	0.001014	1.8e-05	2.223e-05	5e-07	0.282502	3.6e-05
mud - 12	1.46736	0.00015	1.88692	0.00017	0.001033	1.5e-05	2.204e-05	6.4e-07	0.28251	4.7e-05
mud - 13	1.46734	0.00018	1.88659	0.0002	0.001053	2e-05	2.297e-05	5.2e-07	0.282513	4.6e-05
mud - 14	1.46734	0.00016	1.88667	0.00019	0.000997	1.9e-05	2.11e-05	5.3e-07	0.282506	4.2e-05
mud - 15	1.46733	0.00014	1.88655	0.0002	0.000954	1.5e-05	2.069e-05	5.7e-07	0.282504	4.2e-05
mud - 16	1.4674	0.00016	1.88695	0.00018	0.001025	1.6e-05	2.179e-05	6e-07	0.282504	3.9e-05
mud - 17	1.46732	0.00018	1.88669	0.00018	0.00102	1.7e-05	2.251e-05	4.5e-07	0.282512	4.8e-05
mud - 18	1.4673	0.00014	1.88653	0.00019	0.00098	1.6e-05	2.157e-05	6.5e-07	0.282509	3.7e-05
mud - 19	1.46723	0.0001	1.88662	0.00014	0.000993	2e-05	2.123e-05	6.6e-07	0.282503	4.5e-05
mud - 20	1.46737	0.00017	1.88695	0.00019	0.001027	1.8e-05	2.266e-05	5.9e-07	0.282508	5.2e-05
Spot	178Hf/177Hf	± 2σ	180Hf/177Hf	± 2σ	176Yb/177Hf	± 2σ	176Lu/177Hf	± 2σ	176Hf/177Hf	± 2σ
91500 - 1	1.46736	0.00021	1.88668	0.00021	0.01113	8e-05	0.00029566	9.2e-07	0.282323	5.5e-05
91500 - 2	1.46739	0.00016	1.88707	0.00031	0.011534	6.9e-05	0.00030703	8e-07	0.282258	6.3e-05
91500 - 3	1.46736	0.00017	1.88685	0.00026	0.010541	3.8e-05	0.00028217	9.7e-07	0.282256	6.7e-05
91500 - 4	1.46737	0.00022	1.88669	0.0002	0.010621	3.8e-05	0.0002852	1.1e-06	0.282278	6.2e-05
91500 - 5	1.46732	0.00016	1.88709	0.00024	0.010379	6e-05	0.00027798	8.1e-07	0.282245	5.7e-05
91500 - 6	1.46725	0.00015	1.88652	0.0002	0.010975	4.9e-05	0.000293	1.3e-06	0.282325	6.3e-05
91500 - 7	1.46737	0.00017	1.88654	0.00023	0.010205	6.5e-05	0.00027268	8.5e-07	0.282307	7.8e-05
91500 - 8	1.46737	0.00016	1.88694	0.00025	0.01017	5.1e-05	0.00027194	8.5e-07	0.282296	5.7e-05
91500 - 9	1.46728	0.00017	1.88654	0.00022	0.011018	6.4e-05	0.00029505	9.7e-07	0.282264	6.1e-05
91500 - 10	1.4673	0.00015	1.88645	0.00025	0.011264	5.7e-05	0.00030044	8.8e-07	0.28232	6.5e-05
91500 - 11	1.46726	0.00017	1.88642	0.00025	0.011255	6.7e-05	0.0003014	1e-06	0.282349	5.3e-05
91500 - 12	1.46719	0.00014	1.88686	0.00037	0.010907	5.2e-05	0.00029248	7.7e-07	0.282324	7.7e-05
91500 - 13	1.46722	0.00016	1.88658	0.00028	0.01087	5.9e-05	0.000291	1.1e-06	0.282312	8.7e-05
91500 - 14	1.46726	0.00015	1.88676	0.00026	0.011098	5.3e-05	0.0002985	1e-06	0.282271	5.3e-05
91500 - 15	1.46731	0.00017	1.88638	0.00028	0.010901	5.9e-05	0.0002933	1.1e-06	0.282419	4.7e-05
91500 - 16	1.46722	0.00012	1.88684	0.00023	0.011036	5.5e-05	0.000297	1.2e-06	0.282315	6.7e-05
91500 - 17	1.46738	0.00017	1.88691	0.00026	0.010851	4.6e-05	0.0002917	1.2e-06	0.282259	5.8e-05
91500 - 18	1.46716	0.00018	1.88643	0.00029	0.010399	4.8e-05	0.0002784	1.1e-06	0.282292	5.3e-05
91500 - 19	1.46726	0.00018	1.88645	0.00029	0.01094	7.4e-05	0.00029367	9.9e-07	0.282305	6.1e-05
91500 - 20	1.46717	0.00017	1.88677	0.00024	0.010399	5.9e-05	0.00027923	9.8e-07	0.282235	5.8e-05
Spot	178Hf/177Hf	± 2σ	180Hf/177Hf	± 2σ	176Yb/177Hf	± 2σ	176Lu/177Hf	± 2σ	176Hf/177Hf	± 2σ
GJ1 - 1	1.46731	0.00017	1.88687	0.00024	0.010546	4.8e-05	0.00028966	6e-07	0.282038	5.2e-05
GJ1 - 2	1.46726	0.00018	1.88653	0.00022	0.010731	4.9e-05	0.00029543	8.3e-07	0.28204	4.9e-05
GJ1 - 3	1.46736	0.00017	1.88664	0.00025	0.010767	4.6e-05	0.00029596	8.9e-07	0.281998	4.9e-05
GJ1 - 4	1.4673	0.00019	1.88675	0.00023	0.01084	4.8e-05	0.00029725	7.9e-07	0.281926	4e-05
GJ1 - 5	1.46727	0.00012	1.88672	0.00016	0.010872	4.8e-05	0.00029904	8.3e-07	0.281997	5.9e-05
GJ1 - 7	1.46738	0.00015	1.88678	0.00021	0.010671	5.3e-05	0.00029556	8.2e-07	0.282043	5.1e-05
GJ1 - 8	1.46742	0.00015	1.8868	0.00021	0.010659	4.3e-05	0.0002957	1e-06	0.282021	4.7e-05
GJ1 - 9	1.46732	0.00014	1.88666	0.00028	0.010569	5.2e-05	0.00029266	7.3e-07	0.282034	5.6e-05
GJ1 - 10	1.46728	0.00015	1.88662	0.00021	0.010545	3.7e-05	0.00029297	8.7e-07	0.281979	5.8e-05
GJ1 - 11	1.46734	0.00013	1.88688	0.00024	0.010558	4.5e-05	0.00029368	7.1e-07	0.282029	5.3e-05
GJ1 - 12	1.46731	0.00013	1.88664	0.00023	0.01058	5.5e-05	0.0002944	7.4e-07	0.282013	5.1e-05
GJ1 - 13	1.46726	0.00018	1.88653	0.00017	0.01056	4.5e-05	0.00029368	6.2e-07	0.28202	5.4e-05
GJ1 - 14	1.46725	0.00018	1.88679	0.0002	0.010518	4.8e-05	0.00029296	9.2e-07	0.282045	4.8e-05
GJ1 - 15	1.46715	0.00017	1.88673	0.00023	0.010471	5.1e-05	0.00029041	8.8e-07	0.281996	4.5e-05
GJ1 - 16	1.46734	0.00012	1.88688	0.00027	0.010365	4.3e-05	0.00028836	9.4e-07	0.282022	5e-05
GJ1 - 17	1.4673	0.00014	1.88666	0.00025	0.010425	4.9e-05	0.00028942	9e-07	0.282056	4.9e-05
GJ1 - 18	1.46738	0.00016	1.88689	0.00024	0.010362	4.9e-05	0.00028995	9.1e-07	0.281998	6.2e-05
GJ1 - 19	1.46732	0.00012	1.88675	0.00029	0.010312	4.8e-05	0.00028665	8.4e-07	0.281983	6e-05
GJ1 - 20	1.4674	0.00015	1.88653	0.00019	0.010699	4.9e-05	0.0002967	8.5e-07	0.282016	4.6e-05
Spot	178Hf/177Hf	± 2σ	180Hf/177Hf	± 2σ	176Yb/177Hf	± 2σ	176Lu/177Hf	± 2σ	176Hf/177Hf	± 2σ
ples - 1	1.46738	0.0002	1.88679	0.0002	0.007065	1.7e-05	0.00012385	7.1e-07	0.282461	4.5e-05
ples - 2	1.46733	0.00017	1.88685	0.00016	0.003796	1.7e-05	6.927e-05	7.5e-07	0.282476	4.3e-05
ples - 3	1.46719	0.00014	1.88669	0.00018	0.006487	1.5e-05	0.000116	6.5e-07	0.282492	4.1e-05
ples - 4	1.46728	0.00015	1.8867	0.00014	0.00719	5.5e-05	0.00012802	5.6e-07	0.282458	4.4e-05
ples - 5	1.46733	0.00011	1.88669	0.00018	0.010347	3.8e-05	0.0001822	4e-07	0.28242	3.6e-05
ples - 6	1.46737	0.00011	1.88708	0.00016	0.010727	2.7e-05	0.00019082	5.9e-07	0.28252	3.9e-05
ples - 7	1.46731	0.00014	1.88657	0.00021	0.010531	5.4e-05	0.00018575	4.2e-07	0.282498	4.3e-05
ples - 8	1.46733	0.00015	1.88682	0.00021	0.008628	6.9e-05	0.00016059	7.1e-07	0.282425	4.4e-05
ples - 9	1.4673	0.00014	1.88679	0.00016	0.004984	1.7e-05	8.823e-05	5.3e-07	0.282555	3.8e-05
ples - 10	1.46731	0.00014	1.88665	0.00016	0.00612	2.1e-05	0.0001128	3.9e-07	0.282528	3.7e-05
ples - 11	1.4673	0.00011	1.88661	0.00019	0.008366	4.8e-05	0.00015315	5.1e-07	0.282482	3.7e-05
ples - 12	1.46729	0.00012	1.88687	0.00017	0.009785	6.5e-05	0.00017997	7.4e-07	0.282462	3.8e-05
